# Supplementary material
Source: PubMed Central journal article supplement (PMC3525669)
Supplement: NIHMS2554-supplement-supplement_1.pdf [file NIHMS2554-supplement-supplement_1.pdf]

## SUPPORTING INFORMATION

### Solid-state NMR spectroscopy of 18.5 kDa myelin basic protein reconstituted with lipid vesicles: spectroscopic characterisation and spectral assignments of solvent-exposed protein fragments

Ligang Zhong, Vladimir V. Bamm, Mumdooh A.M. Ahmed,  
George Harauz, Vladimir Ladizhansky  
University of Guelph, Guelph, Canada, N1G 2W1

**Table S1. Spectral assignments of rmMBP (176 residues, including a C-terminal LEH<sub>6</sub> tag) reconstituted with DMPC:DMPG (1:1 mass ratio) lipid vesicles, at a protein-to-lipid mass ratio of 1:1.4.**

| Amino acid | <sup>15</sup> N | <sup>13</sup> C <sub>γ</sub> | <sup>13</sup> C <sup>α</sup> | <sup>13</sup> C <sup>β</sup> | <sup>13</sup> C <sup>γ</sup> | <sup>13</sup> C <sup>δ</sup> | <sup>1</sup> H <sup>α</sup> | <sup>1</sup> H <sup>β</sup> | <sup>1</sup> H <sup>γ</sup> | <sup>1</sup> H <sup>δ</sup> |
|------------|-----------------|------------------------------|------------------------------|------------------------------|------------------------------|------------------------------|-----------------------------|-----------------------------|-----------------------------|-----------------------------|
| T15        |                 | 173.9                        | 61.2                         | 69.5                         |                              |                              |                             |                             |                             |                             |
| A16        | 125.8           | 177.0                        | 52.2                         | 19.1                         |                              |                              | 4.16                        | 1.21                        |                             |                             |
| S17        | 114.3           | 174.3                        | 58.1                         | 63.6                         |                              |                              | 4.31                        | 3.69                        |                             |                             |
| T18        | 114.7           | 173.9                        | 61.6                         | 69.6                         | 21.7                         |                              | 4.16                        | 4.04                        | 0.97                        |                             |
| M19        | 122.9           | 174.7                        | 55.9                         | 33.0                         |                              |                              |                             |                             |                             |                             |
| D20        | 125.4           | 175.6                        | 54.8                         | 41.1                         | 179.1                        |                              | 4.34                        | 2.57                        |                             |                             |
| H21        | 121.9           | 175.0                        | 56.6                         | 29.2                         |                              |                              |                             |                             |                             |                             |
| A22        | 125.1           | 176.6                        | 51.9                         | 19.0                         |                              |                              |                             |                             |                             |                             |
| R23        | 118.2           | 174.4                        | 56.0                         |                              |                              |                              |                             |                             |                             |                             |
| <b>R29</b> |                 | <b>175.8</b>                 | <b>56.2</b>                  | <b>30.4</b>                  | <b>27.0</b>                  | <b>43.3</b>                  | <b>4.16</b>                 | <b>1.66</b>                 | <b>1.45</b>                 | <b>2.99</b>                 |
| <b>H30</b> | <b>121.0</b>    | <b>175.7</b>                 | <b>56.1</b>                  | <b>30.5</b>                  |                              |                              |                             |                             |                             |                             |
| <b>R31</b> | <b>121.0</b>    | <b>175.5</b>                 | <b>55.9</b>                  | <b>30.3</b>                  |                              |                              |                             |                             |                             |                             |
| <b>D32</b> | <b>122.5</b>    |                              | <b>53.7</b>                  |                              |                              |                              |                             |                             |                             |                             |
| D46        |                 | 175.7                        | 54.1                         |                              |                              |                              |                             |                             |                             |                             |
| R47        | 121.6           | 176.4                        | 56.7                         | 29.9                         |                              |                              |                             |                             |                             |                             |
| G48        | 109.0           | 173.3                        | 45.1                         |                              |                              |                              | 3.74                        |                             |                             |                             |
| K51        |                 | 175.7                        | 56.6                         | 32.4                         | 24.7                         | 29.0                         | 4.15                        | 1.60                        | 1.22                        | 1.48                        |
| R52        | 119.5           | 176.4                        | 56.8                         | 29.8                         |                              |                              |                             |                             |                             |                             |
| G53        | 109.0           | 173.3                        | 45.1                         |                              |                              |                              | 3.74                        |                             |                             |                             |
| S54        | 115.4           | 174.4                        | 58.6                         | 63.7                         |                              |                              | 4.27                        | 3.69                        |                             |                             |
| G55        | 110.4           |                              | 45.2                         |                              |                              |                              | 3.74                        |                             |                             |                             |
| H59        |                 | 175.0                        | 56.4                         |                              |                              |                              |                             |                             |                             |                             |
| T60        | 114.4           | 174.0                        | 61.8                         | 69.4                         | 21.7                         |                              | 4.16                        | 4.04                        | 0.97                        |                             |
| R61        | 123.1           | 175.0                        | 56.1                         | 30.7                         | 27.0                         | 43.3                         | 4.16                        | 1.66                        | 1.45                        | 2.99                        |
| T62        | 114.4           | 174.0                        | 61.4                         | 69.4                         | 21.7                         |                              | 4.16                        | 4.03                        | 0.97                        |                             |

|             |              |              |             |             |             |      |             |             |             |      |
|-------------|--------------|--------------|-------------|-------------|-------------|------|-------------|-------------|-------------|------|
| T63         | 115.8        | 173.8        | 61.5        | 69.4        | 21.4        |      | 4.16        | 4.04        | 0.97        |      |
| H64         | 122.0        | 175.8        | 55.7        | 30.5        |             |      |             |             |             |      |
| Y65         | 115.1        | 175.5        | 58.1        | 38.5        |             |      |             |             |             |      |
| G66         | 110.0        | 174.2        | 45.4        |             |             |      |             |             |             |      |
| S67         | 115.6        |              | 57.9        | 63.7        |             |      | 4.27        | 3.69        |             |      |
| K102        |              | 176.2        | 56.0        | 32.1        | 24.7        | 29.0 | 4.15        | 1.60        | 1.22        | 1.48 |
| G103        | 109.3        | 173.3        | 45.2        |             |             |      | 3.74        |             |             |      |
| R104        | 120.3        |              | 55.7        |             |             |      |             |             |             |      |
| S112        |              | 172.8        | 57.8        | 63.9        |             |      |             |             |             |      |
| W113        | 125.9        |              | 58.0        | 30.1        |             |      |             |             |             |      |
| P120        |              | 176.5        | 63.0        | 31.5        | 27.3        | 50.5 | 4.25        | 2.19        | 1.82        | 3.58 |
| G121        | 108.7        |              | 45.1        |             |             |      | 3.74        |             |             |      |
| Y124        |              | 175.4        | 57.4        |             |             |      |             |             |             |      |
| G125        | 109.7        | 174.0        | 45.3        |             |             |      | 3.74        |             |             |      |
| G126        | 108.2        | 173.2        | 44.9        |             |             |      | 3.74        |             |             |      |
| R127        | 116.4        | 175.7        | 56.0        |             |             |      |             |             |             |      |
| A128        | 126.0        | 176.5        | 51.4        |             |             |      |             |             |             |      |
| S129        | 114.7        | 173.9        | 58.0        | 63.5        |             |      | 4.27        | 3.79        |             |      |
| D130        | 125.1        |              | 54.7        | 41.0        | 179.1       |      | 4.34        | 2.57        |             |      |
| <b>S133</b> |              | <b>174.0</b> | <b>58.2</b> | <b>63.4</b> |             |      | <b>4.27</b> | <b>3.69</b> |             |      |
| <b>A134</b> | <b>125.3</b> | <b>176.7</b> | <b>52.3</b> | <b>18.9</b> |             |      | <b>4.16</b> | <b>1.21</b> |             |      |
| <b>H135</b> | <b>118.1</b> |              | <b>56.0</b> |             |             |      |             |             |             |      |
| <b>Y142</b> |              | <b>175.1</b> | <b>57.7</b> | <b>38.2</b> |             |      |             |             |             |      |
| <b>D143</b> | <b>122.4</b> | <b>176.2</b> | <b>55.1</b> | <b>42.2</b> |             |      | <b>4.21</b> | <b>2.50</b> |             |      |
| <b>A144</b> | <b>124.2</b> | <b>177.0</b> | <b>52.1</b> | <b>19.0</b> |             |      | <b>4.16</b> | <b>1.21</b> |             |      |
| <b>Q145</b> | <b>119.5</b> | <b>176.3</b> | <b>56.8</b> | <b>29.8</b> |             |      |             |             |             |      |
| <b>G146</b> | <b>109.0</b> | <b>174.0</b> | <b>45.2</b> |             |             |      | <b>3.74</b> |             |             |      |
| <b>T147</b> | <b>115.6</b> | <b>173.4</b> | <b>61.5</b> | <b>69.2</b> | <b>21.4</b> |      | <b>4.16</b> | <b>4.04</b> | <b>0.97</b> |      |
| <b>L148</b> | <b>122.9</b> |              | <b>56.1</b> |             |             |      |             |             |             |      |
| L154        |              | 175.2        | 56.0        |             |             |      |             |             |             |      |
| G155        | 109.7        | 174.0        | 45.2        |             |             |      | 3.74        |             |             |      |
| G156        | 108.2        | 173.2        | 45.1        |             |             |      |             |             |             |      |
| R157        | 116.4        | 175.5        | 56.0        | 30.3        |             |      |             |             |             |      |
| D158        | 122.5        | 175.5        | 53.7        |             |             |      |             |             |             |      |
| S161        |              | 174.4        | 58.3        | 63.7        |             |      | 4.27        | 3.69        |             |      |
| G162        | 110.4        | 173.4        | 45.2        |             |             |      | 3.74        |             |             |      |
| S163        | 115.4        |              | 57.9        |             |             |      |             |             |             |      |

The spectral assignments are based on HCC, NCOCX, NCACX, CONCACX, and CAN(CO)CX experiments. Assignments with a lesser degree of certainty are given in bold font.

**Table S2. Assignment statistics for membrane-associated rmMBP (176 residues, including a C-terminal LEH<sub>6</sub> tag).**

| Residue type | Number of assigned residues | Total number of residues in 18.5 kDa rmMBP |
|--------------|-----------------------------|--------------------------------------------|
| Threonine    | 6                           | 10                                         |
| Alanine      | 5                           | 11                                         |
| Serine       | 8                           | 20                                         |
| Methionine   | 1                           | 2                                          |
| Aspartate    | 6                           | 9                                          |
| Histidine    | 5                           | 14                                         |
| Arginine     | 9                           | 19                                         |
| Glycine      | 12                          | 24                                         |
| Lysine       | 2                           | 12                                         |
| Tyrosine     | 3                           | 5                                          |
| Tryptophane  | 1                           | 1                                          |
| Proline      | 1                           | 11                                         |
| Leucine      | 2                           | 9                                          |
| Glutamine    | 1                           | 8                                          |
| All types    | 62                          | 176                                        |

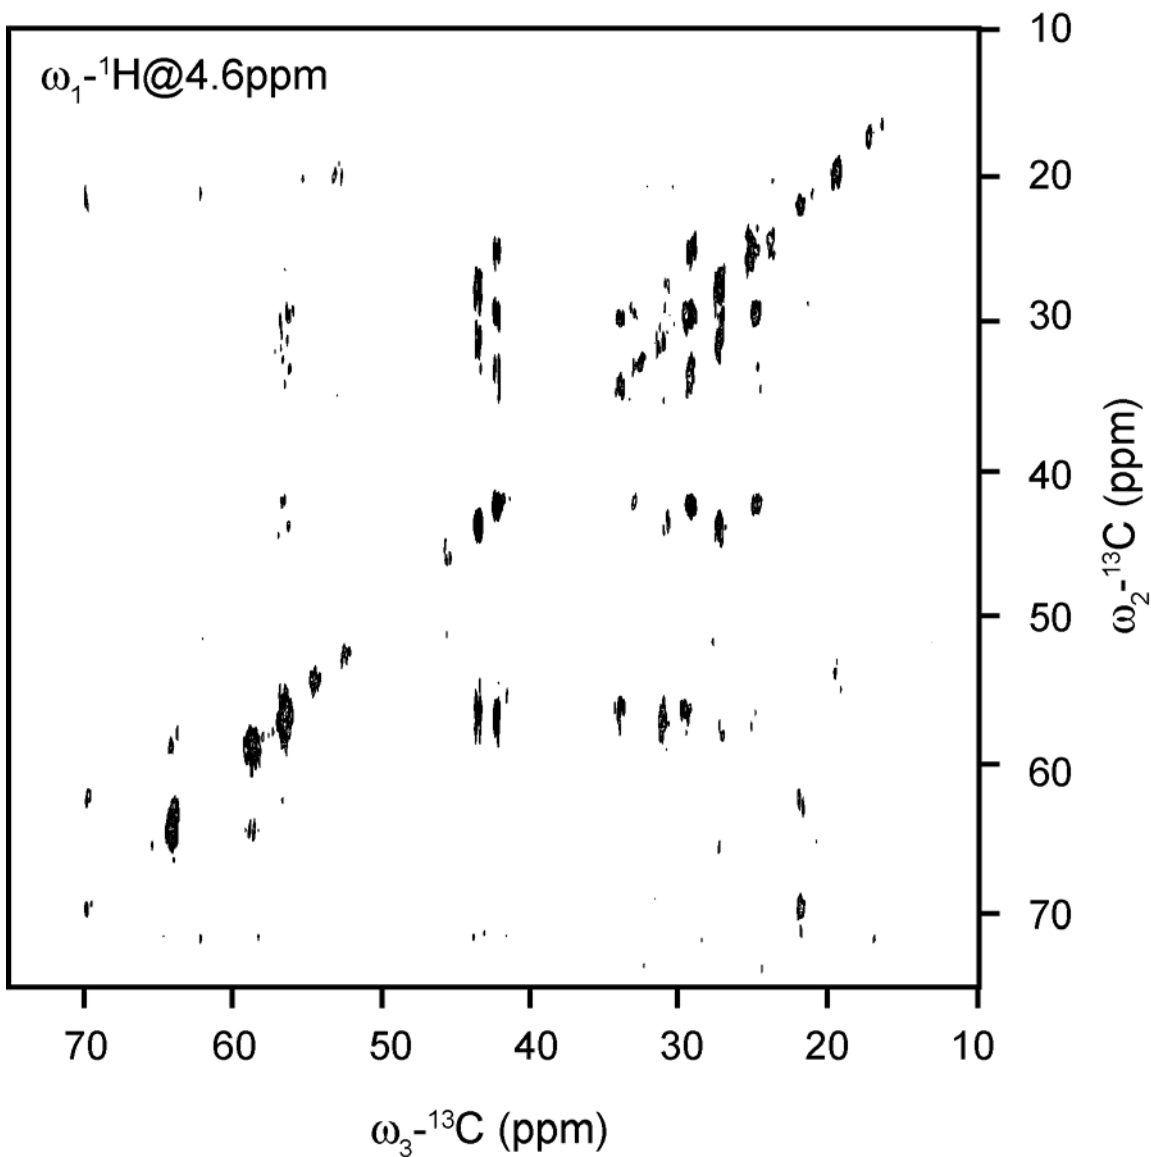

**Figure S1.** The two-dimensional  $^{13}\text{C}$ - $^{13}\text{C}$  plane taken at a proton frequency of 4.6 ppm of the full 3D HHCC experiment. The diagonal and cross-peaks identify carbon atoms that interact with water.

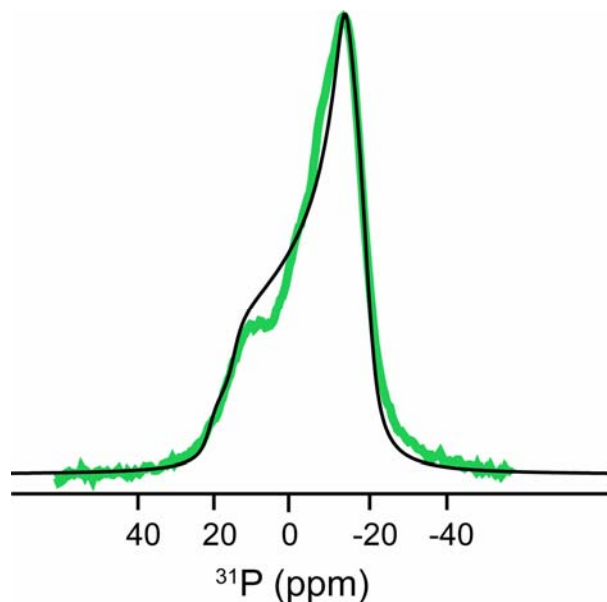

**Figure S2.** The static  $^{31}\text{P}$  spectrum of rmMBP (green) reconstituted with DMPC:DMPG in a 1:1 mass ratio. The spectrum was collected on a Bruker Avance spectrometer operating at a proton Larmor frequency of 500.13 MHz at 32°C, using the Hahn Echo [1] experiment. An 83 kHz TPPM decoupling was used on the proton channel during the delay and acquisition. The CSA parameters used in a SPINEVOLUTION [2] simulation shown in black were as follows: DMPC -  $\Delta\sigma=-38.5$  ppm,  $\eta=0.25$ ; DMPG -  $\Delta\sigma=-31.1$  ppm,  $\eta=0.25$ . The line-broadening used in processing the simulated spectrum was 0.8 kHz. The CSA values are close to those reported for lipid vesicles composed of equal molar amounts of DMPC and DMPG [3]. Slight asymmetry of the CSA tensors may be indicative of protein-lipid interactions, but is not statistically significant - similar patterns can be obtained with smaller asymmetry parameters, but with different line broadening.

- [1] E.L. Hahn, Spin echoes, *Phys. Rev.* 80 (1950) 580-594.
- [2] M. Veshtort, R.G. Griffin, SPINEVOLUTION: A powerful tool for the simulation of solid and liquid state NMR experiments, *Journal of Magnetic Resonance* 178 (2006) 248-282.
- [3] F.M. Marassi, P.M. Macdonald, Response of the headgroup of phosphatidylglycerol to membrane surface charge as studied by deuterium and phosphorus-31 nuclear magnetic resonance, *Biochemistry* 30 (1991) 10558-10566.
